# Supplementary material for: Biallelic NAA60 variants with impaired N-terminal acetylation capacity cause autosomal recessive primary familial brain calcifications
Source: Springer Nature journal article supplement (doi:10.1038/s41467-024-46354-0), 2024-03-13
Supplement: MOESM1 [file 41467_2024_46354_MOESM1_ESM.pdf]

## **Supplementary Note 1. Summary of clinical findings in the reported families**

### **Family 1. *NAA60*, c.321\_327del (p.Arg108Thrfs\*3)**

In Family 1, two siblings from a non-consanguineous British family were included in this study. The proband, case F1-II-1 had a normal birth and normal development until the early twenties. She presented with a combination of movement, cognitive and psychiatric features. She first noticed episodes of unsteadiness; brief loss of consciousness followed by falls when she was in her twenties. An electroencephalogram (EEG) performed at the time did not reveal the cause of these events. At the age of 42 years, she presented to neurology as the falls had increased in frequency. She started falling backwards and her gait became broad-based and was unstable when turning around corners. Her brain CT scan revealed extensive symmetrical calcifications involving basal ganglia, the pons, and the cerebellar structures. Investigations excluded any acquired and metabolic causes of brain calcifications. Her condition progressed and five years into the disease the ataxia-related symptoms deteriorated, her speech became dysarthric and she started to experience word-finding difficulties with significant deterioration in her memory. She developed severe depression requiring medication. Her neurological examination showed a combination of cerebellar ataxia with new additional features of parkinsonism (bradykinesia and rigidity) and cognitive impairment, being unable to follow simple instructions. Neuropsychology testing revealed functioning in the impaired range on an un-timed measure of non-verbal abstract reasoning, suggesting significant decline in non-verbal intellectual abilities. Focal testing revealed grossly impaired attentional and executive functioning and slowed speed of processing. Visual perception was also impaired. Performance was poor on measures of language comprehension and recognition memory. Overall, the profile suggested profound cognitive dysfunction, which although mostly implicated anterior and subcortical functions, was global in nature.

As the condition continued to progress, neurological examination 10 years into her disease, showed significant deterioration. She became wheelchair bound, requiring help with

most daily activities, and developed severe headaches. Neurological examination revealed a combination of severe bradykinesia, rigidity, dystonic postures in the neck and limbs, broken pursuit, reduced up-gaze, dysarthria, weak cough with poorly protruding tongue. Levodopa treatment had a modest benefit at the onset of the disease, but limited benefit was recorded at this stage. On the last examination, 17 years into the disease, she presented with a combination of cognitive deficit, severe extrapyramidal and cerebellar syndrome, severe speech and swallowing difficulties, becoming anarthric and unable to swallow, requiring percutaneous endoscopic gastrostomy (PEG) feeding. At this stage, there were extensive brain calcifications on brain imaging.

Her younger brother, case F1-II-2, had a normal development and health until his twenties. His symptom at onset was severe psychosis requiring hospitalization. He continued to have visual and auditory hallucinations and was subsequently diagnosed with Schizophrenia. Despite medical treatment, the hallucinations were refractory to treatment. A CT scan performed at the age of 39 showed extensive symmetrical brain calcifications involving bilateral basal ganglia. Despite a different onset, the disease progressed in a similar way to his sibling. He started having walking difficulties with a combination of cerebellar and parkinsonian syndrome. Ten years from onset of psychiatric symptoms he needed walking aids and three years after that, he became bed bound. On last examination, 15 years from onset of the disease, the patient required full-time care, was anarthric, unable to swallow and being PEG-fed, presenting very limited movement due to severe rigidity and bradykinesia.

**Family 2. NAA60, c.338-1G>C, p.(Gly113Valfs\*32)**

Family 2 includes two siblings from a consanguineous family of Algerian descent. The proband had normal development until her early thirties. She worked as a restaurant manager. At the age of thirty she presented generalized seizures which led to the discovery of symmetric and extensive brain calcifications involving basal ganglia, cerebellar hemispheres, and fronto-parieto-temporo-occipital cortex. Despite these widespread calcifications, neurological examination was normal. There was no cerebellar ataxia. She could stand more than 10s on

monopodial support and walk a tightrope. She had neither pyramidal tract irritation signs nor extrapyramidal symptoms. EEG was normal. Acquired and metabolic causes of brain calcifications were excluded, as well as variants of *POLG*, *MELAS*, *MERRF*, *SLC20A2*, *PDGFB*, *PDGFRB*, *XPR1* and *TREX1*. CSF study and eye examination were normal. During follow up, she presented insular and temporal seizures easily controlled with lamotrigine. Though she did not develop cerebellar, extrapyramidal, or sensorimotor symptoms, she complained of progressive memory and impulse control disorders. Neuropsychological examination revealed frontal with attention deficit and dysexecutive syndrome, and visuospatial impairment. Two years later, she insidiously developed slight bradykinesia without abnormal gait, which did not require dopamine medication nor physiotherapy. Five years after the initial diagnosis, she is still under lamotrigine monotherapy and does not present significant disability except frontal impairment.

Since childhood, her brother presented an intellectual disability with a delay in speech development since childhood. Nevertheless, he followed a normal schooling until the age of 14. Afterward, he worked as a mechanic in a centre for people with disabilities. In his late twenties he developed a progressive cerebellar syndrome, seizures and extrapyramidal signs which required physiotherapy, lamotrigine, and dopamine medication. A CT-scan performed at the age of 43 showed extensive symmetrical brain calcifications similar to those of his sister. After four years of disease, there is no significant worsening of the clinical signs. Both siblings had macrocrania with an oblong face.

**Family 3. *NAA60*, c.338-1G>C, p.(Gly113Valfs\*32)**

Two sisters were affected by extensive brain calcifications. They were born from consanguineous parents and originated from Morocco. The older sister, suffered from migraine without aura. Upon neurological examination at the age of 31, bilateral Babinski sign was noticed along with mild akineto-hypertonic syndrome, slight dysmetria in the context of unsteadiness, suggesting mild cerebellar syndrome. SARA scale scored 16/40 and UPDRS-III 10/108. CT-scan revealed extensive calcifications (Total Calcification Score = 46).

Metabolic screen revealed no calcium-phosphate metabolism disorder. In addition, she had a history of intellectual disability. Intellectual quotient was not assessed. Minimental state evaluation scored 18/30 at age 33. Physical examination revealed macrocrania, long face, agenesis of second, third and fourth right toes and hypoplasia of second, third and fourth left toes as well as hypopigmented regions on both upper limbs.

Her sibling was referred to an expert neurological center at the age of 24 years for the etiological assessment of extensive brain calcifications identified in the context of cephalalgia. A diagnosis of migraine without aura was performed. She complained of sadness and anxiety and of unsteadiness and fatigue. At ages 24 and 25, neurological examination was normal. However, at the age of 31, neurological examination showed a right Babinski sign and upper limb hypermetria with unsteadiness, indicating a cerebellar involvement. CT-scan revealed extensive calcifications (Total Calcification Score = 50). Metabolic screen revealed no calcium-phosphate metabolism disorder and normal blood lactate and pyruvate levels. Electroencephalography was normal. In addition, she had a history of mild intellectual disability. Neuropsychological assessment revealed a total Intellectual Quotient of 63 (verbal IQ=63, performance IQ=64). She presented some dysmorphic features, including low-set ears and high arched palate. She also presented with coxa valga and underwent surgery in childhood for aortic coarctation and suffered from hearing impairment.

Both parents were reported to be unaffected, but could not be examined.

#### **Family 4. NAA60, c.391C>T, p.His131Tyr**

This family of Gujarati origin have two children and 5 miscarriages. During the pregnancy the baby was noted to be small for gestational age. There was oligohydramnios and she was born by caesarean section at 37 weeks due to breech presentation weighing 2kg. The proband had congenital cataracts, early feeding difficulties, constipation, glue ears and hyperacusis. She was referred to genetics age 10 years with ADHD (diagnosed at age 6 years), short stature (<9<sup>th</sup> centile), learning difficulties, delayed speech and language development, and dyspraxia. She exhibited sensory seeking behaviour. On examination she licked her hands repeatedly,

presented poor social skills and struggled to hold a conversation. When concentrating on tasks, she made tongue movements and had abnormal posturing. She also had low tone, sweaty palms, hypopigmented linear birthmark on her right upper arm, almond shapes eyes, and low set ears. She presented dystonia and chorea. Parents observed that she had difficulty making friends and engaging in conversations. When concentrating on tasks she would protrude her tongue and have posturing. She was treated with methylphenidate for her ADHD and had a positive response on the medication.

Her brain MRI showed symmetrical low signal in globus pallidus bilaterally and supratentorially some scattered dots and small patches of T2/FLAIR hyperintensity predominantly in the frontoparietal subcortical white matter bilaterally. She also presents generalised pruritis, multiple allergies, and congenital cataracts.

#### **Family 5. *NAA60 c.130C>T, p.Arg44Cys***

The proband was born to consanguineous parents and presented delayed motor milestones, pyramidal signs, seizures, and dystonia. He also had an abnormal EEG and dysmorphic features. Antiepileptic treatment was started due to seizures. He used multiple antiepileptics over the years due to ongoing seizures and he still does. At the last physical examination, he was microcephalic, had impaired motor development, no head control and no unassisted sitting. There were joint deformities with spasticity in the extremities. He speaks in single words, unable to form sentences. The brain MRI showed multiple T2 and Flair intense foci in the subcortical and cortical regions of the bilateral cerebral hemispheres, atrophy in the left cerebral peduncle, and cortical thickening areas compatible with polymicrogyria in the bilateral perisylvian regions, temporal and parietal areas of the left cerebral hemisphere. There was no calcification in brain CT.

#### **Family 6. *NAA60 c.50T>G, p.Leu17Arg***

The proband is a male from consanguineous parents from Turkey. He presented at 12 years old with motor and cognitive developmental delay, first observed at 6 months old. He has a history of seizures without fever at the age of 8-9 months and was since treated with sodium valproate. Due to hyperactivity, a child psychiatrist was consulted when he was 2 years old, and methyl phenidate was started. At 3 years old, a shift in the eyes was noticed and glasses were given due to severe astigmatism and hyperopia. At last examination, he could speak but was not clearly understood. On examination, he presents with mild intellectual disability, microcephaly, high palate, strabismus, spasticity, pyramidal syndrome (brisk reflexes, upgoing plantars), Pes planus, assisted in long-distance walking.

**Family 7. NAA60 c.428A>C, p.Asn143Thr**

A single affected Saudi male born to non-consanguineous parents, both from the same tribe is the only affected member in kindred of nine siblings. The index had normal development until the age of 27 years when he presented with upper respiratory tract infection (high-grade fever and cough) and later developed facial asymmetry with slurred speech and decreased concentration. Past medical history included two head traumas, at 1 year old after a fall without any complication and at 7 years old after an accidental head injury that required suturing. His physical examination revealed mild cognitive impairment with MoCA score of 22/30. Neurological examination showed a combination of pyramidal and cerebellar syndrome. Brain MRI revealed multifocal ischemic changes including chronic and subacute ischemic changes, and extensive intracranial calcifications. There was also evidence of multifocal narrowing of the distal intracranial arteries compatible with intracranial vasculopathy. On CT scan, multifocal scattered intracranial coarse calcification was seen. In addition, PET-CT brain with dopa challenge of the patient gave a very unexpected pattern where dopa uptake by the basal ganglia was normal despite extensive calcification. Other investigations showed normal transthoracic echocardiography and neurophysiology examination showed no electrophysiological evidence of peripheral neuropathy in the upper or lower extremities, and EEG was normal for awake and drowsy EEG.

**Supplementary Figure 1. DNA sequencing results from NAA60 PFBC Families 1 to 7.**

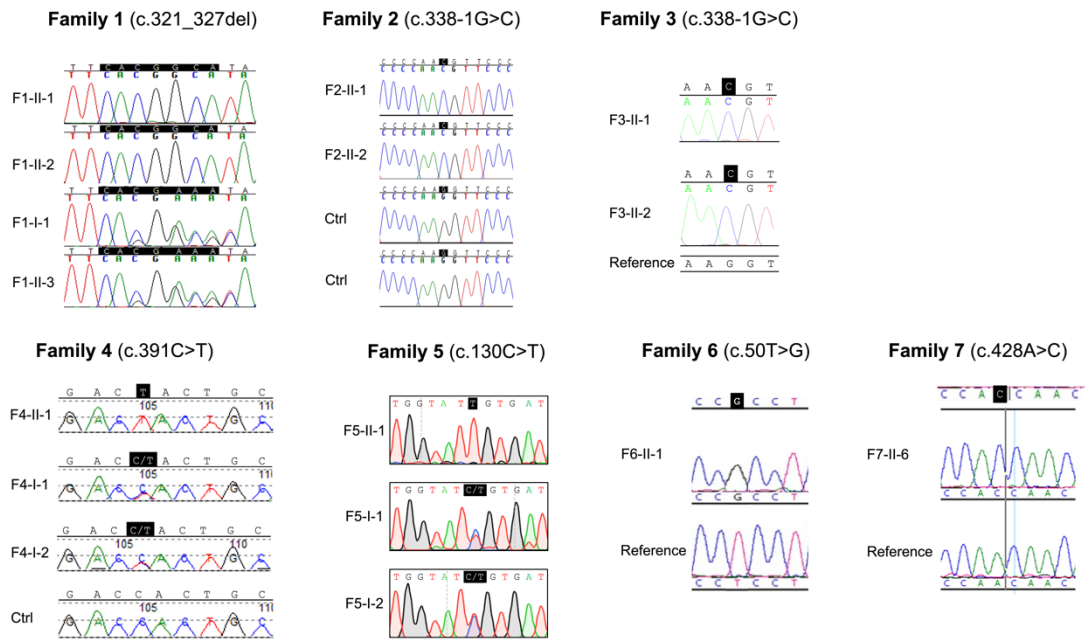

Sanger sequencing data and segregation analysis from all families. Accompanying Figure 1.

**Supplementary Figure 2. Homozygosity mapping in Families 1 to 4.**

**a**

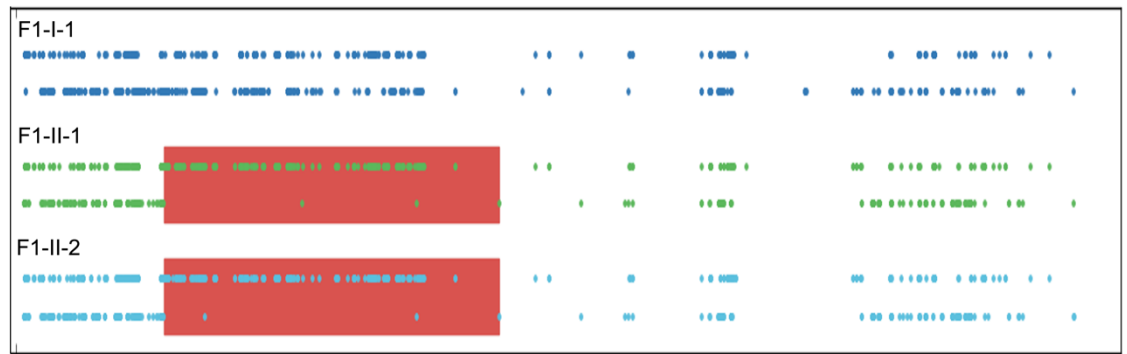

16

ROH plot for 16p13.3 (Family 1)

**b**

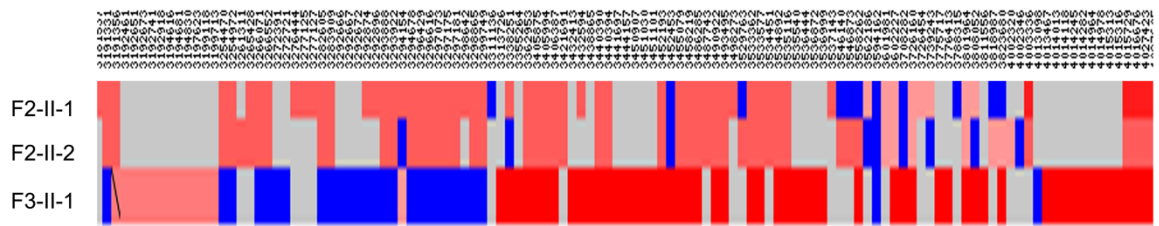

ROH plot for 16p13.3 (Family 2 and Family 3)

**c**

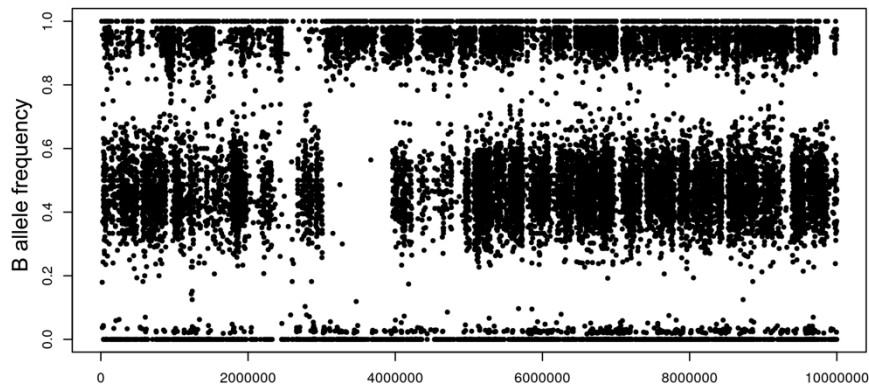

ROH plot for 16p13.3 (Family 4)

**a**, Three homozygous regions identified, which were shared by the two affected individuals in Family 1. **b**, regions of homozygosity (ROH) from affected members Family 2 (first two rows) and Family 3 (third row) did not show solid runs of homozygosity shared between the two families. **c**, regions of loss of heterozygosity in Family 4. These regions were on chromosome 16 and included *NAA60*. Accompanying Figure 1.



**Supplementary Figure 3. RNA analysis of the *NAA60* c.338-1G>C variant confirming cryptic splice site activation.**

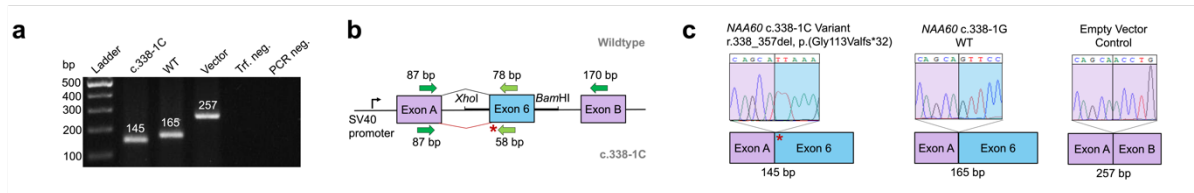

**a**, Gel electrophoresis of the *NAA60* c.338-1G>C variant, c.338-1G wild-type and empty pSPL3 vector amplicons. Both transfection (Trf) and PCR negative (neg) controls were performed as expected. **b**, Vector construct of the *in vitro* splice assay. Amplicons containing either the wild-type (upper splice profile in black) or variant (lower splice profile in red) were inserted between exons A and B of the pSPL3 vector. Primers used for amplification of the wild-type and variant cDNAs are shown with the dark green forward arrow annealing to Exon A (87 bp) and a light green reverse arrow annealing to exon 4 (78 bp for wild-type and 58 bp for variant). The empty vector was amplified using the two dark green arrows annealing to exons A and B. The cryptic splice activation site is depicted with an asterisk. **c**, cDNA amplicons are shown from left to right: A schematic of the c.338-1C variant with cryptic splice activation in exon 6, deleting 20 nucleotides (r.338\_357del, p.(Gly113Valfs\*32)) (left), wild-type c.338-1G (middle) and an empty vector control (right). Accompanying Figure 1.

**Supplementary Figure 4. Predictions for differences in protein stability ( $\Delta\Delta G$ ) and flexibility ( $\Delta\Delta S_{vib}$ ) for the missense mutants (F4-F7).**

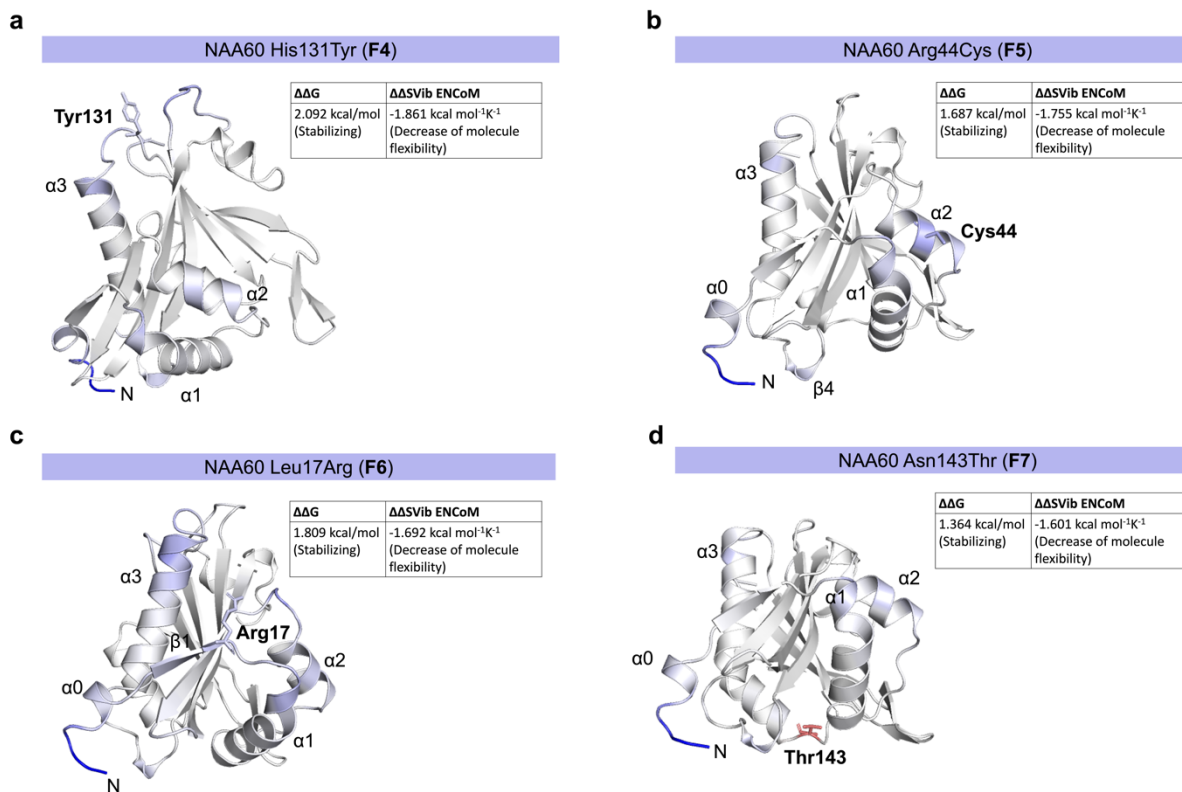

The values of folding free energy changes upon mutations ( $\Delta\Delta G$ ) were above 0 for all mutants (a, His131Tyr; b, Arg44Cys; c, Leu17Arg; d, Asn143Thr) indicating increased protein stabilization in the mutants. All mutants showed values below 0 for changes in vibrational entropy ( $\Delta\Delta S_{vib}$  ENCoM), indicating a loss in flexibility upon mutation. The parts of the structure with increased flexibility upon mutation are illustrated in blue. Predictions were made in DynaMut. Accompanying Figure 2.

**Supplementary Figure 5. *NAA60* gene expression in various tissues.**

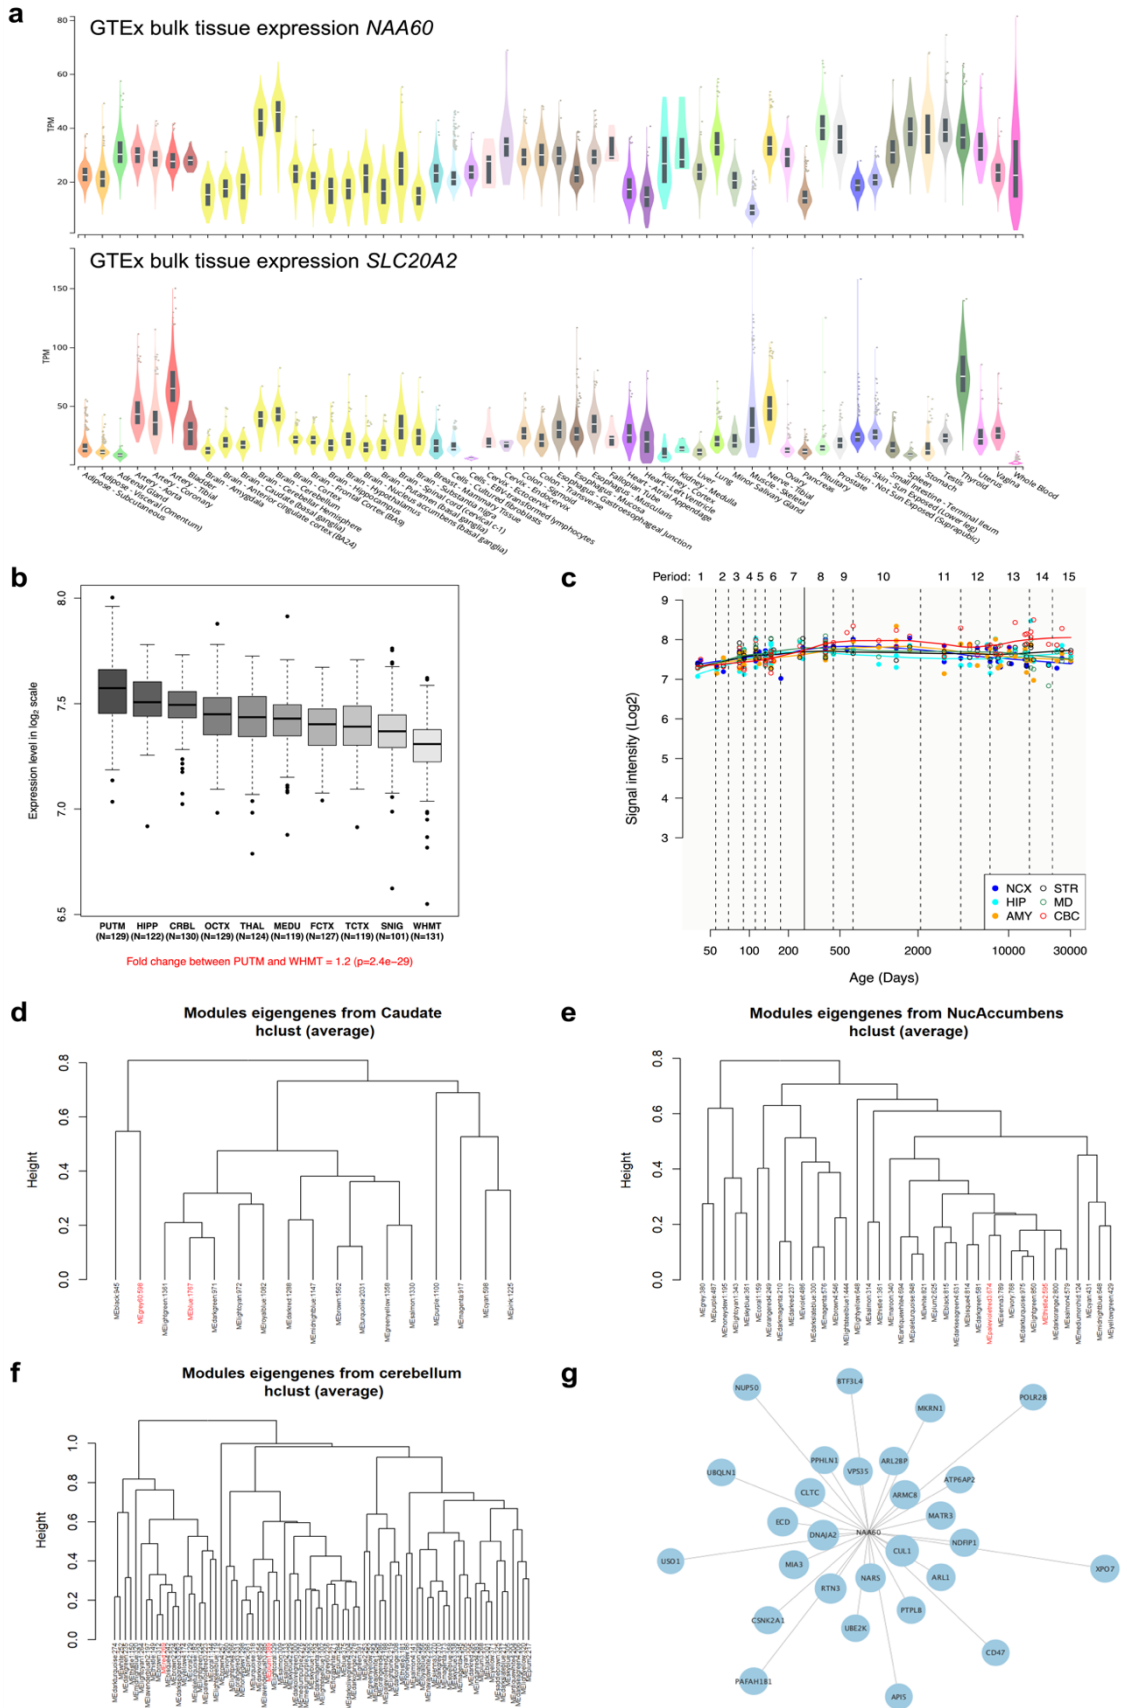

**a**, GTEX gene expression of *NAA60* and *SLC20A2* and **b**, BRANIAC *NAA60* gene expression in different brain areas in adult pathologically normal human brains show that *NAA60* is expressed in all ten brain regions with highest expression detected in the putamen, cerebellum, and occipital regions (PUTM – putamen, HIPPO – hippocampus, CRBL – cerebellum, OCTX – occipital cortex, THAL – thalamus, MEDU – medulla, FCTX – frontal cortex, TCTX – temporal cortex, SNIG – substantia nigra, WHMT – white matter). **c**, *NAA60* gene expression in the developing brain (NCX - neocortex; STR – striatum, HP – hippocampus, AMY – amygdala, MD – midbrain, CBC – cerebellum). **d-f**, Eigengenes correlation. In the three brain tissues of interest (cerebellum, nucleus accumbens and caudate), *NAA60* and *SLC20A2* belong to different modules within each tissue-specific network. However, for the nucleus accumbens network, these two modules are very close, and these can be visualised in the corresponding dendrogram. In each dendrogram, the modules of interest are highlighted in red. **g**, Top-Down plot of the *NAA60* module genes in the caudate tissue. Only the most connected genes are shown. Size of gene nodes reflect their connectivity with the rest of genes in the module. Proximity of genes in the plot reflects their similarity in terms of shared connections with other genes.

**Supplementary Table 1.** *In silico* prediction of reported NAA60 variants.

| Family                                                                                                                                                                                                                                                                                                                                                                                                                                                                                                                                                   | 1                                |         | 2                                                 |         | 3       |         | 4                                      | 5                                            | 6                                      | 7                                      |
|----------------------------------------------------------------------------------------------------------------------------------------------------------------------------------------------------------------------------------------------------------------------------------------------------------------------------------------------------------------------------------------------------------------------------------------------------------------------------------------------------------------------------------------------------------|----------------------------------|---------|---------------------------------------------------|---------|---------|---------|----------------------------------------|----------------------------------------------|----------------------------------------|----------------------------------------|
| Individual                                                                                                                                                                                                                                                                                                                                                                                                                                                                                                                                               | F1-II-1                          | F1-II-2 | F2-II-2                                           | F2-II-1 | F3-II-1 | F3-II-2 | F4-II-1                                | F5-II-1                                      | F6-II-6                                | F7-II-6                                |
| Consanguinity                                                                                                                                                                                                                                                                                                                                                                                                                                                                                                                                            | No                               |         | Yes                                               |         |         |         | No                                     | Yes                                          | Yes                                    | Yes                                    |
| cDNA sequence                                                                                                                                                                                                                                                                                                                                                                                                                                                                                                                                            | c.321_327del                     |         | c.338-1G>C                                        |         |         |         | c.391C>T                               | c.130C>T                                     | c.50T>G                                | c.428A>C                               |
| Amino acid change                                                                                                                                                                                                                                                                                                                                                                                                                                                                                                                                        | (p.Arg108Thrfs*3)                |         | p.(Gly113Valfs*32)                                |         |         |         | (p.His131Tyr)                          | (p.Arg44Cys)                                 | (p.Leu17Arg)                           | (p.Asn143Thr)                          |
| Zygoty                                                                                                                                                                                                                                                                                                                                                                                                                                                                                                                                                   | Homozygous                       |         | Homozygous                                        |         |         |         | Homozygous                             | Homozygous                                   | Homozygous                             | Homozygous                             |
| AF in gnomAD                                                                                                                                                                                                                                                                                                                                                                                                                                                                                                                                             | Absent                           |         | Absent                                            |         |         |         | 3/152156 (all South Asian)             | Absent                                       | 1/17976 (East Asian) All hets          | 2/249122 All hets                      |
| AC in 100k GP*                                                                                                                                                                                                                                                                                                                                                                                                                                                                                                                                           | 1                                |         | Absent                                            |         |         |         | 5 (all hets)                           | Absent                                       | Absent                                 | Absent                                 |
| AF in 100k GP                                                                                                                                                                                                                                                                                                                                                                                                                                                                                                                                            | 1/156390                         |         | 0                                                 |         |         |         | 5/156390 (All hets)                    | Absent                                       | Absent                                 | Absent                                 |
| <b><i>In silico</i> predictions</b>                                                                                                                                                                                                                                                                                                                                                                                                                                                                                                                      |                                  |         |                                                   |         |         |         |                                        |                                              |                                        |                                        |
| SIFT                                                                                                                                                                                                                                                                                                                                                                                                                                                                                                                                                     | NA                               |         | NA                                                |         |         |         | Deleterious (0.05)                     | Deleterious (0.003)                          | Deleterious (0)                        | Deleterious (0.01)                     |
| Polyphen                                                                                                                                                                                                                                                                                                                                                                                                                                                                                                                                                 | NA                               |         | NA                                                |         |         |         | Benign (0.072)                         | Possibly damaging (0.855)                    | Probably damaging (0.95)               | Probably damaging (0.99)               |
| PROVEAN                                                                                                                                                                                                                                                                                                                                                                                                                                                                                                                                                  | NA                               |         | NA                                                |         |         |         | Neutral (-0.87)                        | Damaging (-4.62)                             | Neutral (-2.02)                        | Damaging (-5.23)                       |
| Mutation Taster                                                                                                                                                                                                                                                                                                                                                                                                                                                                                                                                          | Disease causing (1.0000)         |         | Disease causing (1.0000)                          |         |         |         | Disease causing (0.9999)               | Disease causing (0.9999)                     | Disease causing (1.0000)               | Disease causing (1.0000)               |
| CADD                                                                                                                                                                                                                                                                                                                                                                                                                                                                                                                                                     | NA                               |         | NA                                                |         |         |         | 23.9                                   | 26.4                                         | 18.5                                   | 27                                     |
| Splicing Predictions                                                                                                                                                                                                                                                                                                                                                                                                                                                                                                                                     | NA                               |         | MaxEnt: -100.0%<br>NNSPLICE: -100.0% SSF: -100.0% |         |         |         | NA                                     | NA                                           | NA                                     | NA                                     |
| GERP (2.dp)                                                                                                                                                                                                                                                                                                                                                                                                                                                                                                                                              | NA                               |         | NA                                                |         |         |         | 5.46                                   | 5.34                                         | 5.77                                   | 5.46                                   |
| PrimateAI                                                                                                                                                                                                                                                                                                                                                                                                                                                                                                                                                | NA                               |         | NA                                                |         |         |         | Damaging (0.88)                        | Tolerated (0.52)                             | Tolerated (0.78)                       | Tolerated (0.426)                      |
| M-CAP                                                                                                                                                                                                                                                                                                                                                                                                                                                                                                                                                    | No                               |         | No                                                |         |         |         | Damaging (0.6)                         | Damaging (0.48)                              | Tolerated (0.01)                       | Damaging (0.73)                        |
| Has been seen in other unrelated cases before                                                                                                                                                                                                                                                                                                                                                                                                                                                                                                            | No                               |         | No                                                |         |         |         | No                                     | No                                           | No                                     | No                                     |
| ACMG classification                                                                                                                                                                                                                                                                                                                                                                                                                                                                                                                                      | Pathogenic (PVS1, PM2, PP3, PP4) |         | Pathogenic (PVS1, PM2, PP3, PP4)                  |         |         |         | Likely Pathogenic (PS3, PM2, PP3, PP4) | Variant of uncertain significance (PM2, PP3) | Likely Pathogenic (PM2, PP3, PS3, PP4) | Likely Pathogenic (PM2, PP3, PS3, PP4) |
| Abbreviations: AC = Allele count; AF = Allele frequency; 100k GP = 100 000 Genomes Project; gnomAD = The Genome Aggregation Database; hets = heterozygous); NA = not available, * N=78195 individuals in 100k GP aggregate file, ACMG=The American College of Medical Genetics and Genomics, SIFT=sorts intolerant from tolerant; PROVEAN=Protein Variation Effect Analyzer; CADD = The Combined Annotation Dependent Depletion score ; GERP= The Genomic Evolutionary Rate Profiling score; M-CAP= Mendelian Clinically Applicable Pathogenicity score. |                                  |         |                                                   |         |         |         |                                        |                                              |                                        |                                        |

**Supplementary Note 2**

## **SYNaptopathies and Paroxysmal Syndromes (SYNaPS) Study Group Members**

Dr Rauan Kaiyrzhanov<sup>1,11</sup>, Dr Reza Maroofian<sup>1</sup>, Dr Stephanie Efthymiou<sup>1</sup>, Dr Vincenzo Salpietro<sup>1</sup>, Prof Henry Houlden<sup>1</sup>, Dr Viorica Chelban<sup>1</sup>, Prof Fowzan S Alkuraya<sup>42</sup>, Dr Hoda Tomoum<sup>43</sup>, Dr Zhibek Zholdasova<sup>44</sup>, Dr Issam Al-Khawaja<sup>45</sup>, Dr Paola Nicolaidis<sup>46</sup>, Dr Ani Gevorgyan<sup>47</sup>, Dr Biayna Sukhudyana<sup>47</sup>, Prof Sherifa, Ahmed Hamed<sup>48</sup>, Dr Carmela Scuderi<sup>49</sup>, Dr Ganieva Manizha<sup>50</sup>, Dr Maksud Isrofilov<sup>50</sup>, Dr Kamran Salayev<sup>51</sup>, Dr Lolade Taiwo<sup>52</sup>, Prof Dagmar Timmann<sup>53</sup>, Prof Massimo Zollo<sup>54</sup>, Prof Mohamed El Khorassani<sup>55</sup>, Prof Njideka U. Okubadejo<sup>56</sup>, Dr Oluwadamilola O. Ojo<sup>56</sup>, Dr Richard Boles<sup>57</sup>, Dr Yahaya Obiabo<sup>58</sup>, Dr Liana Fidani<sup>59</sup>, Prof Shen-Yang Lim<sup>60</sup>, Prof Halise Neslihan Önemli Mungan<sup>61</sup>, Prof Mhammed Aguenouz<sup>62</sup>, Prof Shazia Maqbool<sup>63</sup>, Prof Bru Cormand<sup>64</sup>, Dr Larissa Arning<sup>65</sup>, Dr Alagoma Iyagba<sup>66</sup>, Prof Stanislav Groppa<sup>2</sup>, Prof Mohamedl A. Abd El Hamed<sup>67</sup>, Dr Manizha Ganieva<sup>68</sup>, Dr Cleanthe Spanaki<sup>69</sup>, Dr Georgia Xiromerisiou<sup>70</sup>, Dr Wolfgang Nachbauer<sup>71</sup>, Prof Sylvia Boesch<sup>71</sup>, Dr Maia Beridze<sup>72</sup>, Dr Mariam Kekenadze<sup>72</sup>, Prof Sanni Abubakar<sup>73</sup>, Dr Nuzhat Noreen Rana<sup>74</sup>, Prof Salman Kirmani<sup>75</sup>, Prof Shahnaz Ibrahim<sup>75</sup>, Dr Blagovesta Marinova Karashova<sup>76</sup>, Dr Hadil Kathom<sup>76</sup>, Prof Daniela Avdjieva<sup>76</sup>, Prof Jun Mine<sup>77</sup>, Dr Gabriella Di Rosa<sup>78</sup>, Prof Giangluigi Marseglia<sup>79</sup>, Prof Tipu Sultan<sup>80</sup>, Prof Jatinder S. Goraya<sup>81</sup>, Dr Salvatore Savasta<sup>82</sup>, Dr Ernest Nwazor<sup>83</sup>, Dr Erin Torti<sup>84</sup>, Dr Rima Ibadova<sup>85</sup>, Prof Radka Tincheva<sup>86</sup>, Dr Osama Atawneh<sup>87</sup>, Dr Benigno Monteagudo Sanchez<sup>88</sup>, Dr Belen Pérez-Dueñas<sup>89</sup>, Dr Mayte García-Silva<sup>90</sup>, Dr Amira Nabil<sup>91</sup>, Dr Michail Vikelis<sup>92</sup>, Prof Pasquale Striano<sup>93</sup>, Dr Tanya Stojkovic<sup>94</sup>, Dr Giovanna Morello<sup>95</sup>, Prof Gabriella Silvestri<sup>96</sup>, Dr Simona Portaro<sup>97</sup>, Prof Barbara Garavaglia<sup>98</sup>, Dr Kanan Jafarov<sup>99</sup>, Dr Farooq Shaikh<sup>100</sup>, Dr Chingiz Shashkin<sup>101</sup>, Dr Kairgali Koneyev<sup>101</sup>, Dr Fuad Al-Mutairi<sup>102</sup>, Dr Eugenia Borgione<sup>103</sup>, Dr Olapeju Oguntunde<sup>104</sup>, Prof Arn M J M van den Maagdenberg<sup>105</sup>, Prof Michel D. Ferrari<sup>106</sup>, Dr Konstantin Senkevich<sup>107</sup>, Dr Sughra Guliyeva<sup>108</sup>, Dr Ulviyya Guliyeva<sup>108</sup>, Dr Gia Melikishvili<sup>109</sup>, Dr Nazi Tabatadze<sup>109</sup>, Prof George Koutsis<sup>110</sup>, Prof Savvas Papacostas<sup>111</sup>, Prof Abdullah Al-Ajmi<sup>112</sup>, Dr Altynay Karimova<sup>113</sup>, Prof Selina Banu<sup>114</sup>, Prof Morenikeji Komolafe<sup>115</sup>, Dr Sophia Sopromadze<sup>116</sup>, Dr Irina Khatiashvili<sup>117</sup>, Prof Mercedes Pineda-Marfa<sup>118</sup>, Dr Yevgen Trufanov<sup>119</sup>, Dr Nazira Zharkynbekova<sup>120</sup>, Dr Samson Khachatryan<sup>121</sup>, Dr Mariam Isayan<sup>121</sup>, Dr Zaruhi Tavadyan<sup>121,122</sup>, Prof Eleni Zamba Papanicolaou<sup>123</sup>, Prof Pierangelo Veggiotti<sup>124</sup>, Prof Salvatore Mangano<sup>125</sup>, Prof Yves A. Dauvilliers<sup>126</sup>, Dr Efthymios Dardiotis<sup>127</sup>, Dr Gali Heimer<sup>128</sup>, Dr Alfons Macaya Ruiz<sup>129</sup>, Dr Uduak Williams<sup>130</sup>, Dr Abiodun H. Bello<sup>130</sup>, Prof Kolawole Wahab<sup>131</sup>, Prof Alberto Verrotti<sup>132</sup>, Dr Oluchi Ekenze<sup>133</sup>

### **Supplementary Note 3.**

#### **SYNaptopathies and Paroxysmal Syndromes (SYNaPS) Study Group Affiliations**

<sup>1</sup>Department of Neuromuscular Diseases, UCL Queen Square Institute of Neurology, London, WC1N 3BG, United Kingdom. <sup>2</sup>Department of Neurology and Neurosurgery, Institute of Emergency Medicine, Chisinau, Republic of Moldova. <sup>43</sup>Ain Shams Pediatrics Hospital, Ain-Shams University, Cairo, 11665, Egypt. <sup>44</sup>Al-Farabi Kazakh National University, Al-Farabi Avenue 71, Almaty 050040, Kazakhstan. <sup>45</sup>Albashir University Hospital, Amman, Jordan. <sup>46</sup>American Medical Center, Nicosia, Cyprus. <sup>47</sup>Arabkir Joint Medical Center, Yerevan, Armenia. <sup>48</sup>Assiut University Hospital, Assiut, Egypt. <sup>49</sup>Associazione Oasi Maria SS, 94018 Troina, Italy. <sup>50</sup>Avicenna Tajik State Medical University, Dushanbe, Tajikistan. <sup>51</sup>Azerbaijan State Medical University, Baku, Azerbaijan. <sup>52</sup>Babcock University, Ilishan, Remo & Federal Medical Centre, Abeokuta, Ogun State, Nigeria. <sup>53</sup>Braun Neurologische Universitätsklinik Universität Essen, Hufelandstr 55, Essen D-45122, Germany. <sup>54</sup>CEINGE, Biotecnologie Avanzate S.c.a.r.l., Naples, Italy. <sup>55</sup>Children's Hospital of Rabat, University of Rabat, Rabat 6527, Morocco. <sup>56</sup>College of Medicine, University of Lagos (CMUL) & Lagos University

Teaching Hospital, Idi Araba, Lagos State, Nigeria.<sup>56</sup>College of Medicine, University of Lagos, (CMUL) & Lagos University Teaching Hospital (LUTH), Idi Araba, Lagos State, Nigeria.<sup>57</sup>Courtagen Life Sciences, 12 Gill Street Suite 3700, Woburn, MA 01801 USA. <sup>58</sup>Delta State University Teaching Hospital, Oghara, Delta State, Nigeria. <sup>59</sup>Department of Biology, Medical School, Aristotle University, Thessaloniki, Greece. <sup>60</sup>Department of Biomedical Science, Faculty of Medicine, University of Malaya, Malaysia. <sup>61</sup>Department of Child Metabolism and Nutrition, Faculty of Medicine, Çukurova University, Adana, Turkey. <sup>62</sup>Department of Clinical and Experimental Medicine, University of Messina, Messina 98123, Italy. <sup>63</sup>Department of Developmental and Behavioral Pediatrics, CH&ICH, Lahore, Pakistan. <sup>64</sup>Department of Genetics, Universitat de Barcelona, Barcelona 08007, Spain. <sup>65</sup>Department of Human Genetics, Ruhr-University Bochum, Bochum 44801, Germany. <sup>66</sup>University of Port Harcourt Teaching Hospital, Port Harcourt, Rivers State, Nigeria. <sup>67</sup>Department of Neurology and Psychiatry, Assuit University Hospital, Assiut, Egypt. <sup>68</sup>Department of Neurology, Avicenna Tajik State Medical University, 734063, Dushanbe, Tajikistan. <sup>69</sup>Department of Neurology, Medical School, University of Crete, Heraklion, Greece. <sup>70</sup>Department of Neurology, Medical School, University of Thessaly, Larissa, Greece. <sup>71</sup>Department of Neurology, Medical University Innsbruck, Anichstrasse 35, Innsbruck 6020, Austria. <sup>72</sup>Department of Neurology, Tbilisi State Medical University, Tbilisi, Georgia. <sup>73</sup>Ahmadu Bello University, Zaria, Kaduna State, Nigeria. <sup>74</sup>Department of Paediatric Neurology, Children Hospital Complex and ICH, Multan, Pakistan. <sup>75</sup>Department of Pediatrics and Child health, Aga Khan University, Karachi, Pakistan. <sup>76</sup>Department of Pediatrics, Medical University of Sofia, Sofia 1431, Bulgaria. <sup>77</sup>Department of Pediatrics, Shimane University, Faculty of Medicine, Izumo, 693-8501, Japan. <sup>78</sup>Department of Pediatrics, University of Messina, Messina 98123, Italy. <sup>79</sup>Department of Pediatrics, University of Pavia, IRCCS Policlinico "San Matteo", Pavia 27100, Italy. <sup>80</sup>Division of Paediatric Neurology, Children's Hospital of Lahore, Lahore 381-D/2, Pakistan. <sup>81</sup>Division of Paediatric Neurology, Dayanand Medical College & Hospital, Ludhiana, Punjab 141001, India. <sup>82</sup>Division of Pediatric Neurology, Department of Pediatrics, University of Pavia, IRCCS Policlinico "San Matteo", Pavia 27100, Italy. <sup>83</sup>Federal Medical Centre, Owerri, Imo State, Nigeria. <sup>84</sup>GeneDX, Gaithersburg, Maryland, USA. <sup>85</sup>Hb Guven Clinic Baku, Azerbaijan. Neurology department. <sup>86</sup>Department of Clinical Genetics, University Pediatric Hospital, Sofia 1431, Bulgaria. <sup>87</sup>Hilal Pediatric Hospital Hebron, Hebron West Bank, Palestine. <sup>88</sup>Hospital Arquitecto Marcide, Avenida de la Residencia S/N, Ferrol (A Coruña), 15401 Spain. <sup>89</sup>Hospital Sant Joan de Deu, Esplugues de Llobregat 08950, Barcelona, Spain. <sup>90</sup>Hospital Universitario 12 de Octubre, Madrid 28041, Spain. <sup>91</sup>Human Genetics, Medical Research Institute, Alexandria University, Egypt. <sup>92</sup>Iatreio Kefalalgias Glyfadas, 8 Lazaraki str, 3rd floor, 16675, Athens, Greece. <sup>93</sup>Institute "Giannina Gaslini", Genova, Italy. <sup>94</sup>Institute of Myology, Hôpital La Pitié Salpêtrière, Paris, France. <sup>95</sup>Institute of Neurological Sciences, National Research Council, Mangone, Italy. <sup>96</sup>Institute of Neurology, Università Cattolica del Sacro Cuore, Rome, Italy. <sup>97</sup>IRCCS Centro Neurolesi "Bonino Pulejo", SS113, c.da Casazza, 98124 Messina, Italy. <sup>98</sup>IRCCS Foundation, Neurological Institute "Carlo Besta", Molecular Neurogenetics, 20126 Milan, Italy. <sup>99</sup>Istanbul Klinik, Azerbaijan. <sup>100</sup>Jeffrey Cheah School of Medicine and Health Sciences, Monash University Malaysia. <sup>101</sup>Kazakh National State University, Almaty, Kazakhstan. <sup>102</sup>King Saud University, Riyadh, Saudi Arabia. <sup>103</sup>Laboratorio di Neuropatologia Clinica, U.O.S. Malattie Neuromuscolari Associazione OASI Maria SS. ONLUS – IRCCS, Via Conte Ruggero 73, 94018 Troina, Italy. <sup>104</sup>Lagos University Teaching Hospital (LUTH), Nigeria. <sup>105</sup>Leiden University Medical Center, Albinusdreef 2, Leiden 2333, Netherlands. <sup>106</sup>McGill University, Canada. <sup>107</sup>Mediclub clinic, Baku, Azerbaijan. <sup>108</sup>MediClub Hospital, Tbilisi, Georgia. <sup>109</sup>Neurogenetics Unit, Neurology Department, Eginition Hospital, National and Kapodistrian University, Athens, Greece. <sup>110</sup>Neurology Clinic B, The Cyprus Institute of Neurology and Genetics, 6 International Airport Road, 1683 Nicosia, Cyprus. <sup>111</sup>Neurology Unit, Department of Medicine, Al-Jahra Hospital, Kuwait. <sup>112</sup>Neuroscience department, Al-Farabi Kazakh National University, Al-Farabi Avenue 71, Almaty 050040, Kazakhstan. <sup>113</sup>Neurosciences Unit, Institute of Child Health and Shishu Shastho Foundation Hospital, Mirpur, Dhaka 1216, Bangladesh. <sup>114</sup>Obafemi Awolowo University Teaching Hospital (OAUTH), Ile-Ife, Osun State, Nigeria. <sup>115</sup>Pineo Medical Ecosystem, Tbilisi, Georgia. <sup>116</sup>S.

Khechinashvili University Hospital, Tbilisi, Georgia. <sup>118</sup>Servei de Neurologia Pediàtrica, l'Hospital Universitari Vall d'Hebron, Barcelona 08035, Spain. <sup>119</sup>Shupyk National Medical Academy Of Postgraduate Education, Kiev, Ukraine. <sup>120</sup>Shymkent Medical Academy, Kazakhstan. <sup>121</sup>Somnus Neurology Clinic Sleep and Movement Disorders Center, Yerevan, Armenia. <sup>122</sup>National Institute of Health, Ministry of Health, Department of Neurology and Neurosurgery, Yerevan, Armenia. <sup>123</sup>The Cyprus Institute of Neurology & Genetics, Nicosia, Cyprus. <sup>124</sup>Unit of Infantile Neuropsychiatry Fondazione Istituto Neurologico "C. Mondino" IRCCS, Via Mondino 2, Pavia 27100, Italy. <sup>125</sup>Unità di Neuropsichiatria Infantile, AOUP "P.Giaccone" Palermo, Italy. <sup>126</sup>University Hospital Montpellier, Montpellier, France. <sup>127</sup>University Hospital of Larissa, Neurology Department, Greece. <sup>128</sup>University Hospital of Tel Aviv, Tel Aviv, Israel. <sup>129</sup>University Hospital Vall d'Hebron, Barcelona 08035, Spain. <sup>130</sup>University of Calabar Teaching Hospital, Calabar, Cross Rivers State, Nigeria. <sup>131</sup>University of Ilorin Teaching Hospital (UITH), Ilorin, Kwara State, Nigeria. <sup>131</sup>University of Ilorin Teaching Hospital (UITH), Ilorin, Kwara State, Nigeria. <sup>132</sup>University of L'Aquila, L'Aquila, Italy. <sup>133</sup>University of Nigeria Teaching Hospital, Ituku-Ozalla, Enugu State, Nigeria.
