# Supplementary material for: Biallelic NAA60 variants with impaired N-terminal acetylation capacity cause autosomal recessive primary familial brain calcifications
Source: Springer Nature journal article supplement (doi:10.1038/s41467-024-46354-0), 2024-03-13
Supplement: MOESM3 [file 41467_2024_46354_MOESM3_ESM.pdf]

**File name: Supplementary Data 1**

**Description:** Caudate enrichment analysis for NAA60 and SLC20A2 modules.

**File name: Supplementary Movie 1**

**Description:** Clinical presentation of patients with NAA60 biallelic variants. Accompanying Figure 1.

**File name: Supplementary Movie 2**

**Description:** NAA60 localizes to the Golgi, close to the cis Golgi marker GM130. SIM 3D render. Accompanying Figure 4a.
